# Supplementary material for: Developing Small‐Molecule Inhibitors of HECT‐Type Ubiquitin Ligases for Therapeutic Applications: Challenges and Opportunities
Source: PubMed Central journal article supplement — Chembiochem. 2018 Oct 17;19(20):2123–35. doi: 10.1002/cbic.201800321 (PMC6471174; doi:10.1002/cbic.201800321), 2018-10-17
Supplement: CBIC-19-2123-s001.pdf [file CBIC-19-2123-s001.pdf]

## **Author Contributions**

*D.C. Writing – original draft: Supporting; Writing – review & editing: Supporting*

*M.G. Writing – original draft: Supporting; Writing – review & editing: Supporting*

*S.L. Conceptualization: Lead; Writing – original draft: Lead.*
